# Supplementary material for: Efficient triplet energy transfer in a 0D metal halide hybrid with long persistence room temperature phosphorescence for time-resolved anti-counterfeiting
Source: Royal Society of Chemistry journal article supplement (doi:10.1039/d3qi01774e), 2023-01-01
Supplement: d3qi01774e1.pdf [file d3qi01774e1.pdf]

Due to an error in the text on page S3, this ESI was updated on 13/12/2023

## Supporting Information

### Efficient Triplet Energy Transfer in 0D Metal Halide Hybrid with Long Persistence Room Temperature Phosphorescence for Time-Resolved Anti-Counterfeiting

Jie Li<sup>a, †</sup>, Jingjie Wu<sup>b, †</sup>, Yonghong Xiao<sup>a</sup>, Longshi Rao<sup>c</sup>, Ruosheng Zeng<sup>d, \*</sup>, Ke Xu<sup>e</sup>,  
Xiao-Chun Huang<sup>a</sup>, Jin Z. Zhang<sup>f</sup> and Binbin Luo<sup>a, \*</sup>

<sup>a</sup> *Department of Chemistry and Chemical Engineering, Key Laboratory for Preparation and Application of Ordered Structural Materials of Guangdong Province, Shantou University, Shantou, 515063, P. R. China*

<sup>b</sup> *Chaozhou Branch of Chemistry and Chemical Engineering Guangdong Laboratory, Chaozhou 521000, P. R. China*

<sup>c</sup> *Department of Mechanical Engineering, College of Engineering, Shantou University, Shantou 515063, P. R. China*

<sup>d</sup> *School of Physical Science and Technology, State Key Laboratory of Featured Metal Materials and Life-cycle Safety for Composite Structures, Guangxi University, Nanning 530004, P. R. China*

<sup>e</sup> *Multiscale Crystal Materials Research Center, Shenzhen Institute of Advanced Technology, Chinese Academy of Sciences, Shenzhen 518055, P. R. China*

<sup>f</sup> *Department of Chemistry and Biochemistry, University of California, Santa Cruz, California 95064, United States*

**Corresponding Author:** [bbluo@stu.edu.cn](mailto:bbluo@stu.edu.cn)

# Table of Contents

|                                  |            |
|----------------------------------|------------|
| <b>Table of Contents.....</b>    | <b>S2</b>  |
| <b>Experimental section.....</b> | <b>S3</b>  |
| <b>Table S1.....</b>             | <b>S5</b>  |
| <b>Figure S1.....</b>            | <b>S6</b>  |
| <b>Figure S2.....</b>            | <b>S7</b>  |
| <b>Figure S3.....</b>            | <b>S8</b>  |
| <b>Figure S4.....</b>            | <b>S9</b>  |
| <b>Table S2.....</b>             | <b>S10</b> |
| <b>Figure S5.....</b>            | <b>S11</b> |
| <b>Figure S6.....</b>            | <b>S12</b> |
| <b>Figure S7.....</b>            | <b>S13</b> |
| <b>Figure S8.....</b>            | <b>S14</b> |
| <b>Table S3.....</b>             | <b>S15</b> |
| <b>Figure S9.....</b>            | <b>S16</b> |
| <b>Figure S10.....</b>           | <b>S17</b> |
| <b>Table S4.....</b>             | <b>S18</b> |
| <b>Table S5.....</b>             | <b>S19</b> |
| <b>Figure S11.....</b>           | <b>S20</b> |
| <b>Figure S12.....</b>           | <b>S21</b> |
| <b>REFERENCE.....</b>            | <b>S22</b> |

## **Experimental section**

### **Materials**

1H-Pyrazole-4-carbonitrile (98%, Adamas), hydrazine dihydrochloride (98%, Sigma-aldrich), indium acetate (99%, Aladdin), antimony(III) chloride (99%, Alfa Aesar), hydrazine hydrate (80%, Xilong Scientific), hydrochloric acid (37%, Guanghua Scientific), ethanol (AR, Guanghua Scientific), ethyl acetate (AR, Guanghua Scientific). All chemicals were used as supplied from commercial sources without further purification.

### **Synthesis of DPTA**

First, 1H-Pyrazole-4-carbonitrile (1.00 g), hydrazine dihydrochloride (1.00 g), 1.00 mL hydrazine hydrate and 10.0 mL ethanol were mixed in a 48 mL glass vessel and heated at 130 °C for 12 h. After cooling to room temperature, the obtained yellow crystals were filtered and washed with water and ethanol. The obtained product was then dried at 50 °C for one day.

### **Synthesis of DIC Single Crystal and DIC:x%Sb Single Crystal**

DIC was synthesized by loading 0.10 mmol DPTA, 0.10 mmol indium acetate into a 15.0 mL pressure bottle containing 3.00 mL HCl. After all reactants were dissolved at 120 °C in the sealed pressure bottle, the solution was cooled to room temperature without perturbation, and the DIC single crystal can be obtained after one day. For DIC:x%Sb samples, 0.10 mmol of DPTA,  $x\% \times 0.1$  mmol of  $\text{SbCl}_3$  and  $(1-x\%) \times 0.1$  mmol of indium acetate were added into a 15.0 mL glass vessel containing 3 mL HCl. After all reactants were dissolved, the solution was cooled to room temperature without perturbation, and the DIC single crystal can be obtained after one day.

## **Characterization**

### **Single crystal X-ray diffraction (SC-XRD)**

SC-XRD tests were conducted on Rigaku XtaLab Pro MM007HF DWX diffractometer at 298 K and 100K using Cu  $K\alpha$  radiation ( $\lambda = 1.5418 \text{ \AA}$ ). The structures were solved by intrinsic phasing method using SHELXT<sup>1</sup> program implanted in Olex2<sup>2</sup>. Refinement with full matrix least squares techniques on F2 was performed by using SHELXL<sup>3</sup>. Non-hydrogen atoms were anisotropic ally refined and all hydrogen atoms were generated based on riding mode.

### **Powder XRD**

PXRD patterns were recorded on MiniFlex 600 (Rigaku) to examine the crystalline phase.

### **UV-vis absorption**

UV-vis spectra were measured on Lambda 950 UV-vis Spectrometer (PerkinElmer).

### **Photoluminescence (PL) and excitation (PLE) spectra**

Both of PL and PLE spectra were collected on PTI QM-TM (Photon Technology International).

### **Absolute PL quantum yield (QY)**

Absolute PL QY was recorded on a HAMAMATSU C11347 spectrometer with integrating sphere with the excitation wavelength of 380 nm for all samples.

### **Inductively coupled plasma atomic emission spectrometry (ICP-AES)**

ICP-AES was applied to detect the molar concentrations of Cd and Sb by using ICPE-9000, Shimadzu.

### **Scanning electron microscope (SEM) and Energy dispersive spectroscopy (EDS) mapping**

SEM images and EDS mapping (JSM-7500F, JEOL) were carried out to obtain the morphology and elemental distribution.

### **Delayed PL and PL lifetime**

Delayed PL and PL lifetime tests were collected on Edinburgh Instruments (FL 1000). The PL decay curves are fitted with exponential function as given in the following expression:

$$I(t) = \sum_n^{i=1} A_i e^{-\frac{t}{\tau_i}}$$

where  $I(t)$  is the PL intensity at time  $t$ ,  $A_i$  represents the relative weights of the decay components,  $\tau_i$  denotes the decay time for the exponential components. The average lifetime is calculated based on the expression below:

$$\tau_{ave} = \frac{\sum_n^{i=1} A_i \tau_i^2}{\sum_n^{i=1} A_i \tau_i}$$

### Computational methodology

To study band composition and band edge of the sample, first-principles calculations were carried out using density functional theory (DFT) as implemented in the VASP code.<sup>4-5</sup> The projector augmented wave (PAW) method was used to describe the interaction between ions and electrons.<sup>6</sup> The structural optimization were calculated using Perdew-Burke-Ernzerhof (PBE) exchange-correlation functional.<sup>7</sup> The simulated model are modified by using primitive cell. The Brillouin zone integration was sampled with  $4 \times 4 \times 4$  K-point meshes for static calculations. Following the space group of these structures, the K points of Brillouin region were referred to the symmetry of their space group to calculate band structure and density of states. The energy cutoff of plane-wave basis is 500 eV. The residual force of all atoms in the models was less than 0.02 eV/Å.

**Table S1.** Crystal data of DPTA.

| Sample                                                                    | DPTA                                                            |
|---------------------------------------------------------------------------|-----------------------------------------------------------------|
| Empirical formula                                                         | C <sub>8</sub> H <sub>8</sub> N <sub>8</sub>                    |
| Formula weight                                                            | 216.22                                                          |
| Temperature/K                                                             | 297.99(10)                                                      |
| Radiation                                                                 | Cu K $\alpha$ ( $\lambda = 1.54178$ )                           |
| Crystal system                                                            | Monoclinic                                                      |
| Space group                                                               | <i>Cc</i>                                                       |
| <i>a</i> /Å                                                               | 4.79560(10)                                                     |
| <i>b</i> /Å                                                               | 11.42880(10)                                                    |
| <i>c</i> /Å                                                               | 16.8917(2)                                                      |
| $\alpha$ /°                                                               | 90                                                              |
| $\beta$ /°                                                                | 96.7230(10)                                                     |
| $\gamma$ /°                                                               | 90                                                              |
| <i>V</i> /Å <sup>3</sup>                                                  | 919.43(2)                                                       |
| <i>Z</i>                                                                  | 4                                                               |
| $\rho_{calc}$ (g/cm <sup>3</sup> )                                        | 1.562                                                           |
| completeness to $\theta_{max}$                                            | 100%                                                            |
| GOF                                                                       | 1.082                                                           |
| <i>R</i> <sub>int</sub>                                                   | 0.0231                                                          |
| final <i>R</i> indexes [ <i>I</i> > 2 $\sigma$ ( <i>I</i> )] <sup>a</sup> | <i>R</i> <sub>1</sub> = 0.0268, <i>wR</i> <sub>2</sub> = 0.0694 |
| <i>R</i> indexes (all data) <sup>a</sup>                                  | <i>R</i> <sub>1</sub> = 0.0270, <i>wR</i> <sub>2</sub> = 0.0697 |
| largest diff. peak and hole,<br>e Å <sup>-3</sup>                         | 0.19/-0.15                                                      |

<sup>a</sup>  $R_1 = \Sigma||F_o| - |F_c|| / \Sigma|F_o|$ ;  $wR_2 = \{[\Sigma w(F_o^2 - F_c^2)^2] / \Sigma[w(F_o^2)^2]\}^{1/2}$ ;  $w = 1/[\sigma^2(F_o^2) + (aP)^2 + bP]$ , where  $P = [\max(F_o^2, 0) + 2F_c^2] / 3$  for all data.

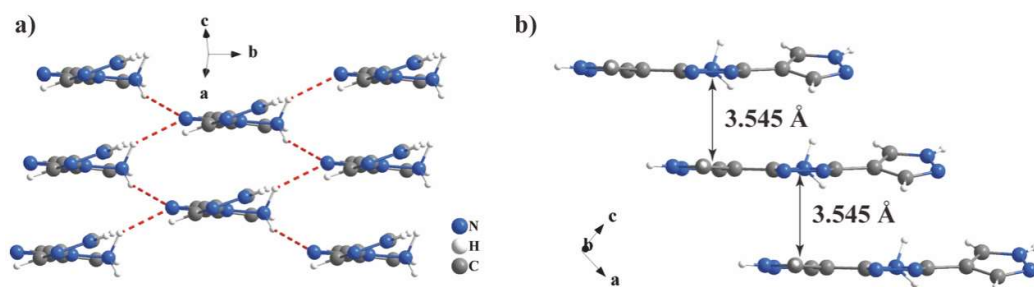

**Figure S1.** (a) Intermolecular hydrogen-bonding interaction and perpendicular distance for DPTA single crystals.

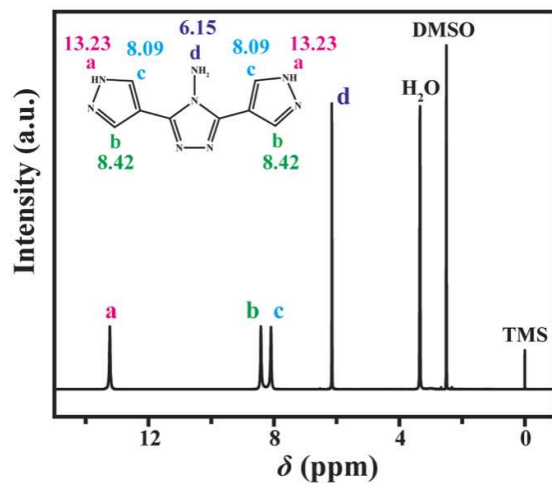

**Figure S2.** <sup>1</sup>H NMR spectrum of DPTA dissolved in *d*<sub>6</sub>-DMSO, DMSO and TMS are denoted to dimethyl sulphoxide and tetramethylsilane, respectively.

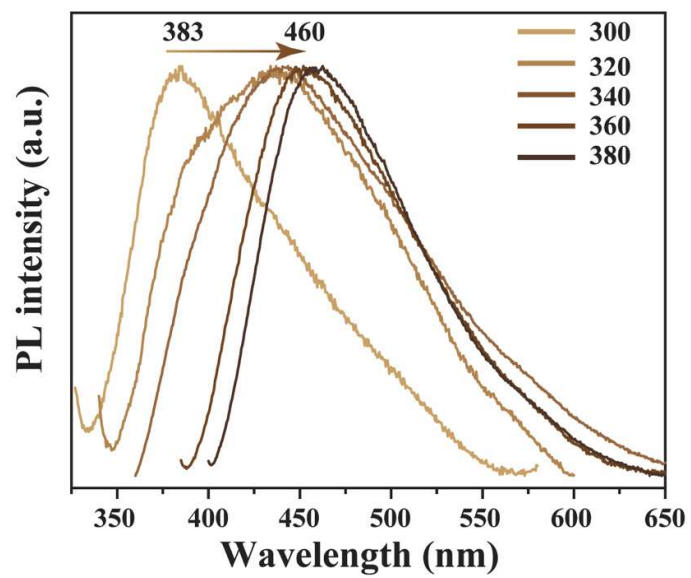

Figure S3. Excitation-dependent PL of DPTA powders.



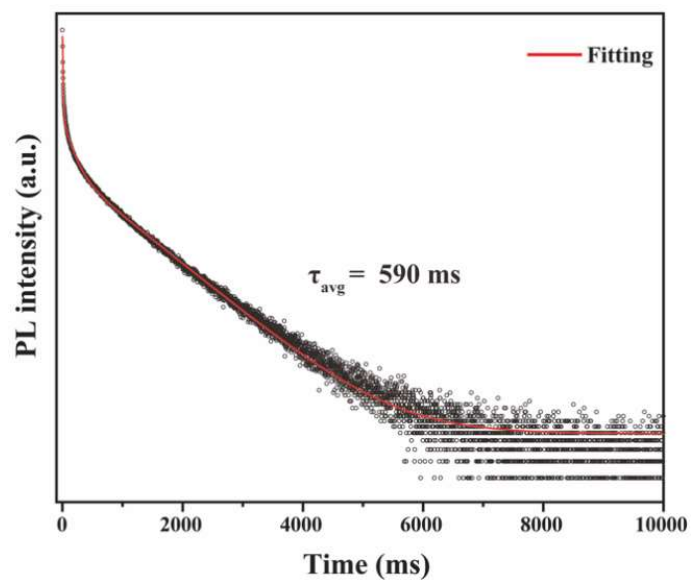

**Figure S4.** PL decay curves of DPTA monitoring at 518 nm with excitation at 365 nm.

**Table S2.** Crystal data of DIC.

| Sample                                              | DIC                                                                              |
|-----------------------------------------------------|----------------------------------------------------------------------------------|
| Empirical formula                                   | C <sub>8</sub> H <sub>16</sub> Cl <sub>6</sub> InN <sub>8</sub> O <sub>2.5</sub> |
| Formula weight                                      | 591.81                                                                           |
| Temperature/K                                       | 297.99(10)                                                                       |
| Radiation                                           | Cu K $\alpha$ ( $\lambda = 1.54178$ )                                            |
| Crystal system                                      | Triclinic                                                                        |
| Space group                                         | $P\bar{1}$                                                                       |
| $a/\text{\AA}$                                      | 7.9545(3)                                                                        |
| $b/\text{\AA}$                                      | 8.1351(3)                                                                        |
| $c/\text{\AA}$                                      | 8.1882(3)                                                                        |
| $\alpha/^\circ$                                     | 106.557(3)                                                                       |
| $\beta/^\circ$                                      | 105.950(3)                                                                       |
| $\gamma/^\circ$                                     | 92.161(3)                                                                        |
| $V/\text{\AA}^3$                                    | 484.46(3)                                                                        |
| $Z$                                                 | 1                                                                                |
| $\rho_{calc}$ (g/cm <sup>3</sup> )                  | 2.029                                                                            |
| completeness to $\theta_{max}$                      | 99.3%                                                                            |
| GOF                                                 | 1.142                                                                            |
| $R_{int}$                                           | 0.0168                                                                           |
| final $R$ indexes [ $I > 2\sigma(I)$ ] <sup>a</sup> | $R_I = 0.0205$ , $wR_2 = 0.0553$                                                 |
| $R$ indexes (all data) <sup>a</sup>                 | $R_I = 0.0206$ , $wR_2 = 0.0553$                                                 |
| largest diff. peak and hole,<br>e $\text{\AA}^{-3}$ | 0.59/-0.58                                                                       |

<sup>a</sup>  $R_I = \Sigma||F_o| - |F_c||/\Sigma|F_o|$ ;  $wR_2 = \{[\Sigma w(F_o^2 - F_c^2)^2]/\Sigma[w(F_o^2)^2]\}^{1/2}$ ;  $w = 1/[\sigma^2(F_o^2) + (aP)^2 + bP]$ , where  $P = [\max(F_o^2, 0) + 2F_c^2]/3$  for all data.

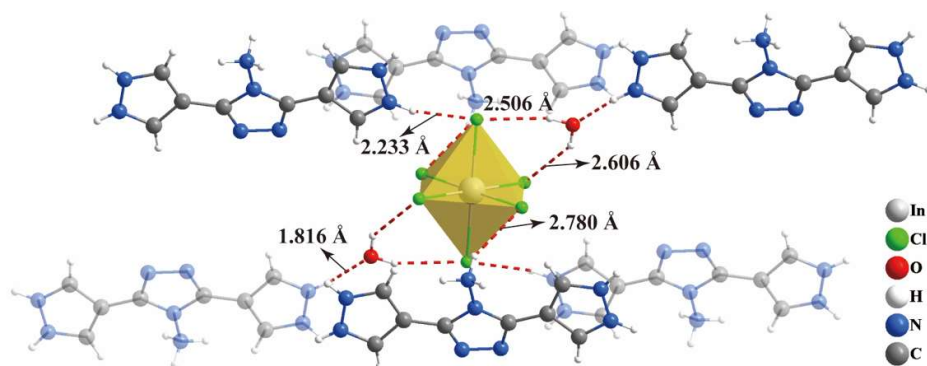

**Figure S5.** Water-mediated hydrogen-bonding network in DIC.

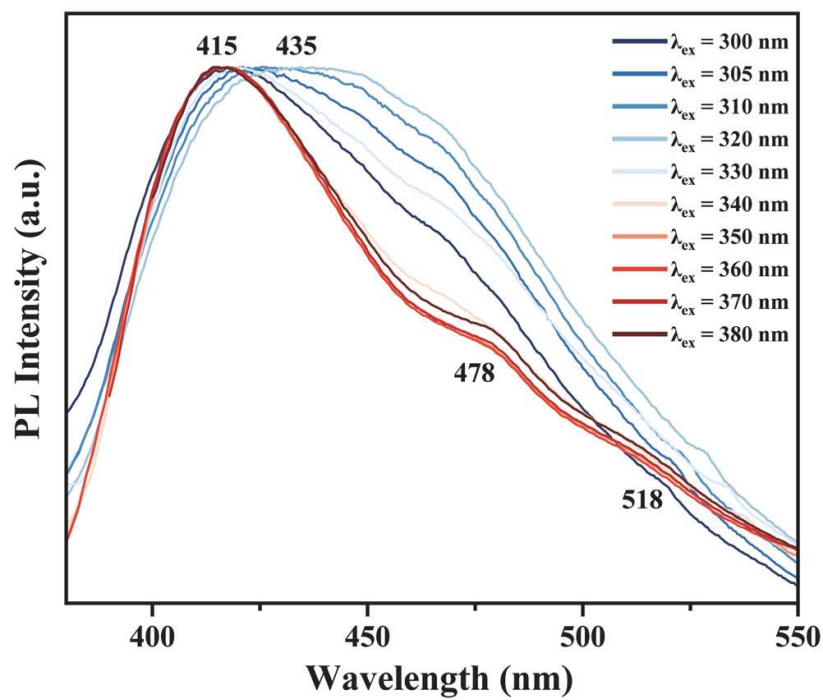

Figure S6. Excitation-dependent PL of DIC powders.

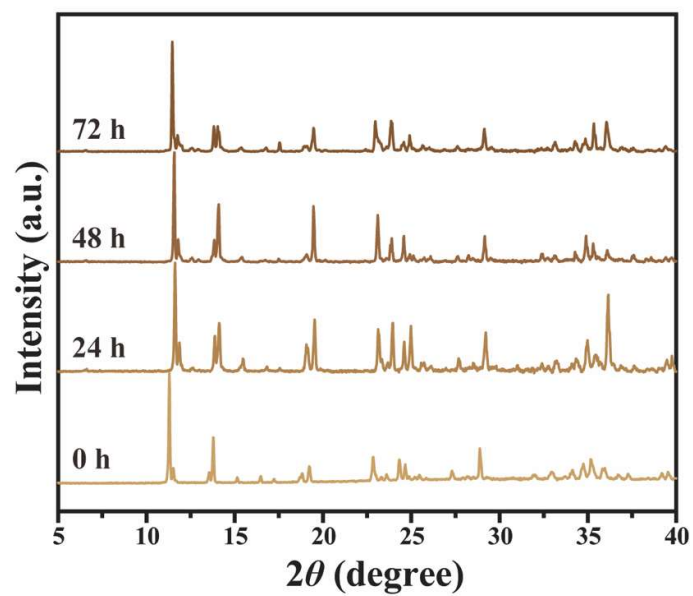

Figure S7. XRD patterns of DIC under open air for different hours.

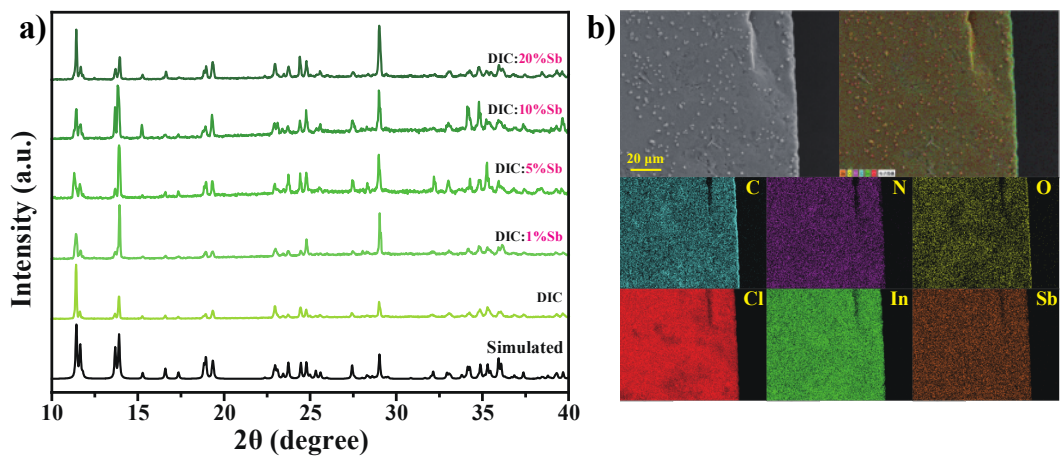

**Figure S8.** (a) XRD of DIC:x%Sb with different Sb doping levels and (b) EDS mapping of DIC:10%Sb.

**Table S3.** Sb<sup>3+</sup> contents of DIC:x%Sb detected through ICP-AES.

| Samples   | Sb atomic ratio |
|-----------|-----------------|
| DIC:1%Sb  | 0.38%           |
| DIC:5%Sb  | 1.34%           |
| DIC:10%Sb | 2.48%           |
| DIC:20%Sb | 4.77%           |

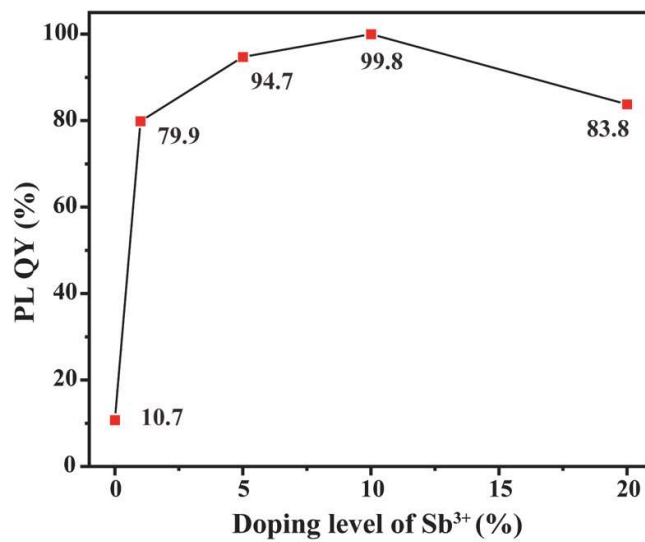

**Figure S9.** PLQY of DIC:x%Sb with different doping levels.



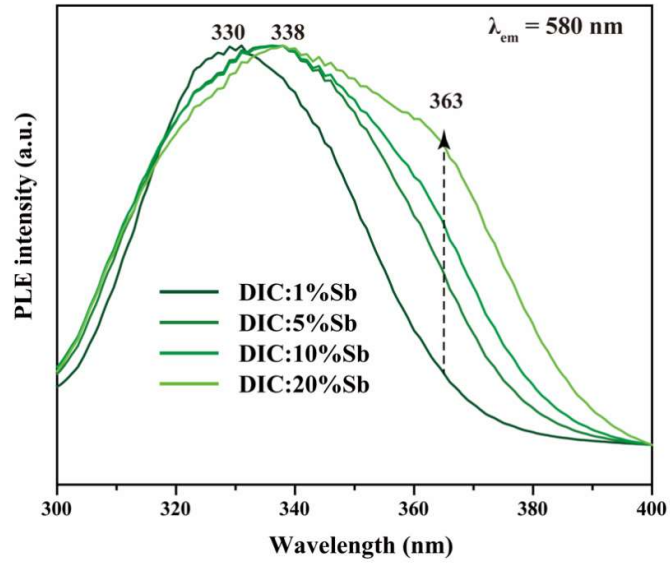

**Figure S10.** PLE spectrum of DIC:x%Sb monitoring at 580 nm.

**Table S4.** Fitting parameters of time-resolved PL for DPTA and DIC:x%Sb at 518 nm.

| Sample    | A <sub>1</sub> | $\tau_1$ (ms) | A <sub>2</sub> | $\tau_2$ (ms) | A <sub>3</sub> | $\tau_3$ (ms) | $\tau_{\text{avg}}$ (ms) | $\Phi_{\text{TET}}$ |
|-----------|----------------|---------------|----------------|---------------|----------------|---------------|--------------------------|---------------------|
| DPTA      | 0.86           | 9.8           | 0.09           | 147           | 0.05           | 845           | 590                      | -                   |
| DIC       | 0.74           | 11.9          | 0.25           | 65            | 0.01           | 650           | 170                      | -                   |
| DIC:1%Sb  | 0.61           | 10.5          | 0.38           | 55            | 0.01           | 500           | 115                      | 32.4%               |
| DIC:5%Sb  | 0.57           | 9.0           | 0.42           | 58            | 0.01           | 330           | 77                       | 54.7%               |
| DIC:10%Sb | 0.45           | 4.8           | 0.54           | 55            | 0.01           | 300           | 73                       | 57.1%               |
| DIC:20%Sb | 0.39           | 3.3           | 0.6            | 48            | 0.01           | 230           | 59                       | 65.3%               |

**Table S5.** Fitting parameters of time-resolved PL for DIC:x%Sb at 580 nm.

| Sample    | $A_1$ | $\tau_1$ ( $\mu\text{s}$ ) | $A_2$ | $\tau_2$ ( $\mu\text{s}$ ) | $A_3$ | $\tau_3$ ( $\mu\text{s}$ ) | $\tau_{\text{avg}}$ ( $\mu\text{s}$ ) |
|-----------|-------|----------------------------|-------|----------------------------|-------|----------------------------|---------------------------------------|
| DIC:1%Sb  | 0.778 | 2.8                        | 0.221 | 9.9                        | 0.001 | 119                        | 7.7                                   |
| DIC:5%Sb  | 0.513 | 3.4                        | 0.486 | 8.4                        | 0.001 | 154                        | 10.3                                  |
| DIC:10%Sb | 0.572 | 3.2                        | 0.427 | 8.3                        | 0.001 | 229                        | 10.8                                  |
| DIC:20%Sb | 0.662 | 3.1                        | 0.337 | 8.7                        | 0.001 | 302                        | 13.3                                  |

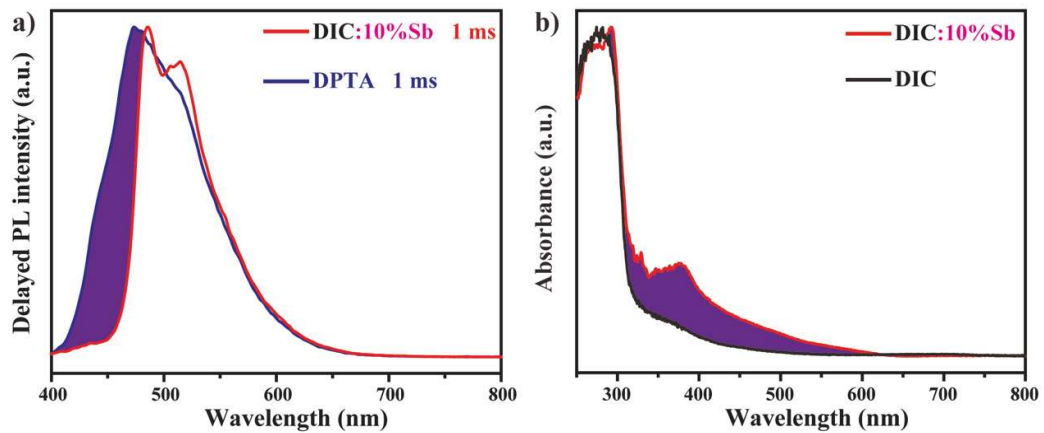

**Figure S11.** The difference (marked with purple) of (a) delayed PL and (b) absorption spectrum among DPTA, DIC and DIC:10%Sb.

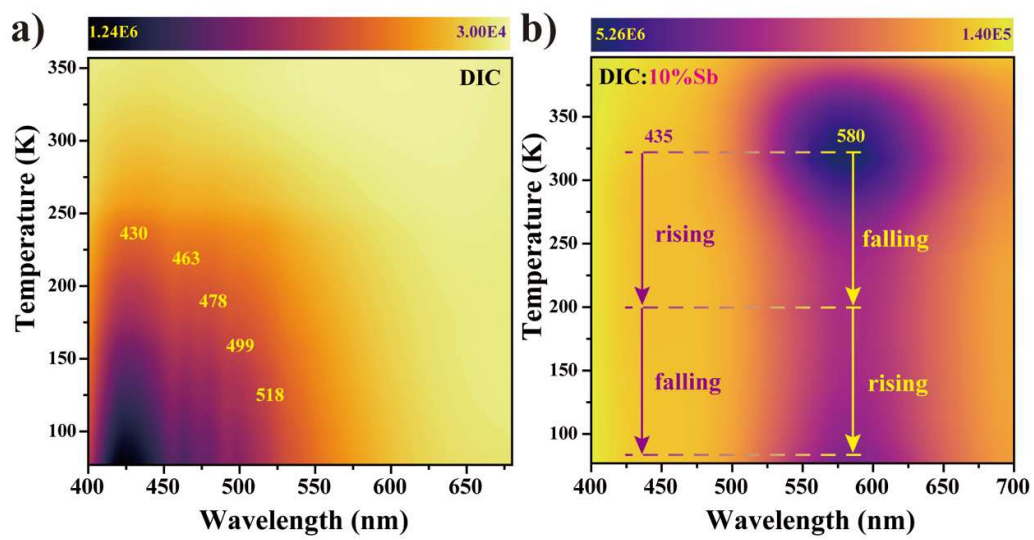

Figure S12. Temperature-dependent PL of (a) pristine DIC and (b) DIC:10%Sb.

## REFERENCES

1. Sheldrick, G. M., Shelxt - Integrated Space-Group and Crystal-Structure Determination. *Acta Cryst. A* **2015**, *71*, 3-8.
2. Dolomanov, O. V. B., L. J.; Gildea, R. J.; Howard, J. A. K.; Puschmann, H., Olex2: A Complete Structure Solution, Refinement and Analysis Program. *J. Appl. Crystallogr.* **2009**, *42*, 339-341.
3. Sheldrick, G. M., A Short History of Shelx. *Acta Cryst. A* **2008**, *64*, 112-122.
4. Furthmüller, G. K. a. J., Efficient Iterative Schemes for Ab Initio Total-Energy Calculations Using a Plane-Wave Basis Set. *Phys. Rev. B* **1996**, *54*, 11169-11186.
5. Joubert, G. K. a. D., From Ultrasoft Pseudopotentials to the Projector Augmented-Wave Method. *Phys. Rev. B* **1999**, *59*, 1758-1775.
6. Blöchl, P. E., Projector Augmented-Wave Method. *Phys. Rev. B* **1994**, *50*, 17953-17979.
7. John P. Perdew, K. B., and Matthias Ernzerhof, Generalized Gradient Approximation Made Simple. *Phys. Rev. Lett.* **1996**, *77*, 3865-3868.
